# Supplementary material for: A naked-eye selective detection of cyanide ion: studies on the effect of chromophores and spacers on ditopic receptors
Source: Royal Society of Chemistry journal article supplement (doi:10.1039/c0an00959h), 2011-01-01

## **Supporting information**

### **A naked-eye selective detection of cyanide ion: Studies on the effect of chromophores and spacers on ditopic receptors**

Vinod Kumar, Hemlata Rana, M. P. Kaushik\*

Process Technology Development Division, Defence R & D Establishment, Jhansi Road, Gwalior  
474002, India

| <b><u>Contents</u></b>                                      | <b><u>Page</u></b> |
|-------------------------------------------------------------|--------------------|
| 1. UV-vis spectra of receptors 4, 5, and 6 with TBA-CN      | 2                  |
| 2. UV-vis spectra of receptors 7, 8, and 9 with TBA-CN      | 3                  |
| 3. $^1\text{H}$ NMR spectra and $^{13}\text{C}$ NMR spectra | 4-15               |

## 6. UV-vis spectra of 4, 5, and 6 with TBA-CN

Absorption spectra of **4**, **5**, and **6** ( $1.8 \times 10^{-5}$  M) with the 5.0 equiv. of TBA-CN, in THF-DMSO (99:1, v/v).

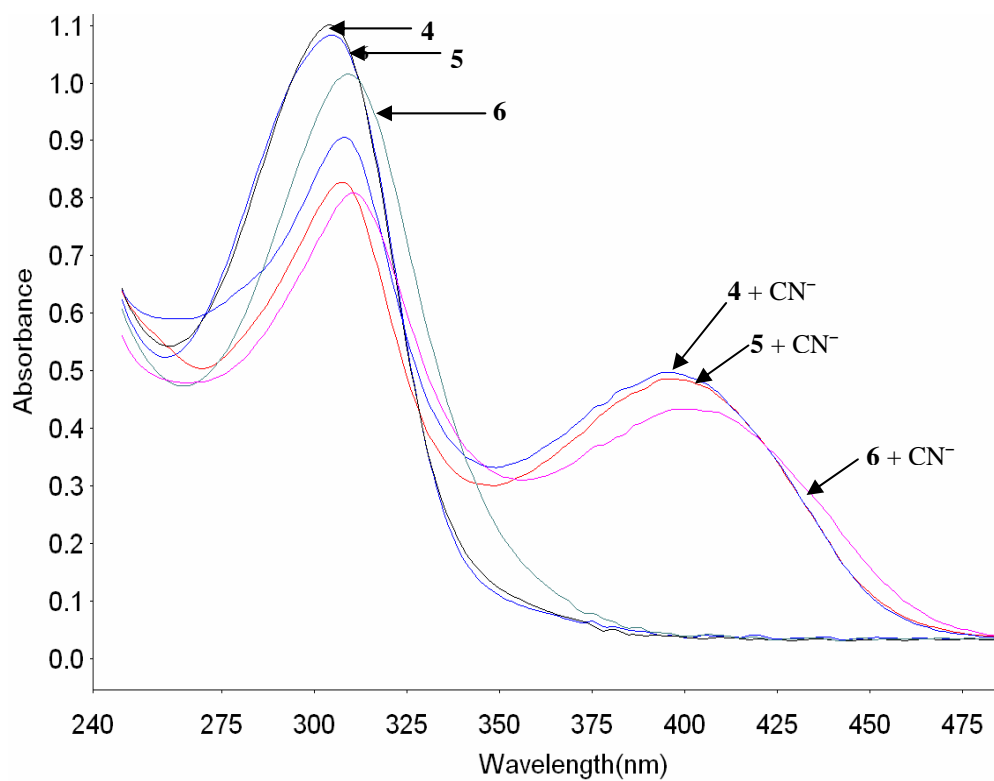

## 8. UV-vis spectra of 7, 8, and 9 with TBA-CN

Absorption spectra of **7**, **8**, and **9** ( $1.8 \times 10^{-5}$  M) with the 5.0 equiv. of TBA-CN, in THF-DMSO (99:1, v/v).

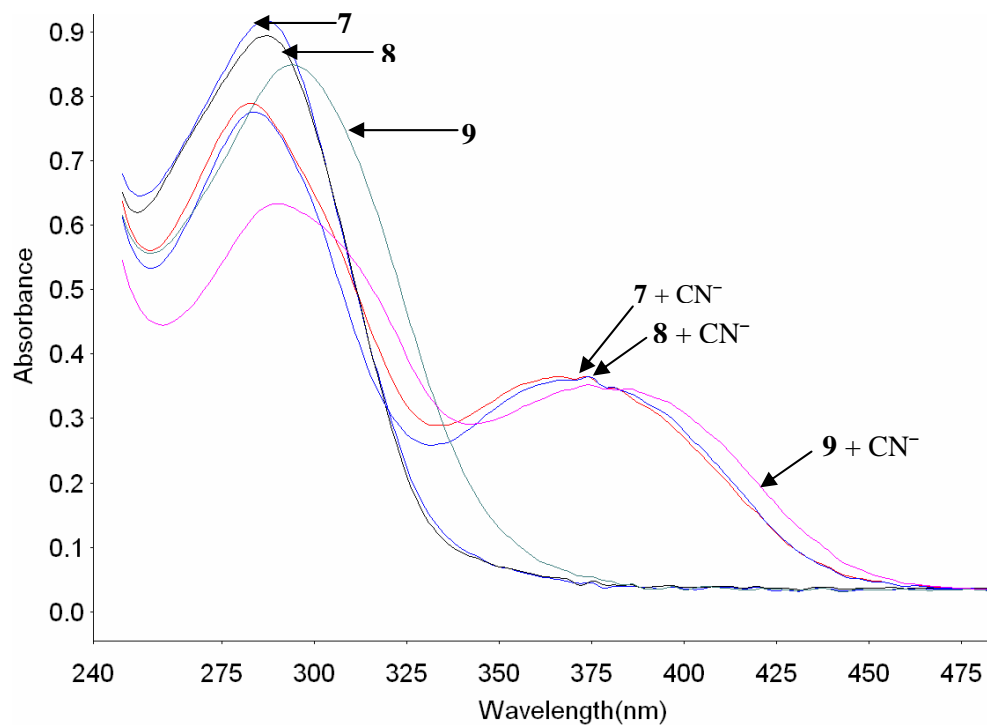

$^1\text{H}$  NMR spectrum of **1** (DMSO- $d_6$ )

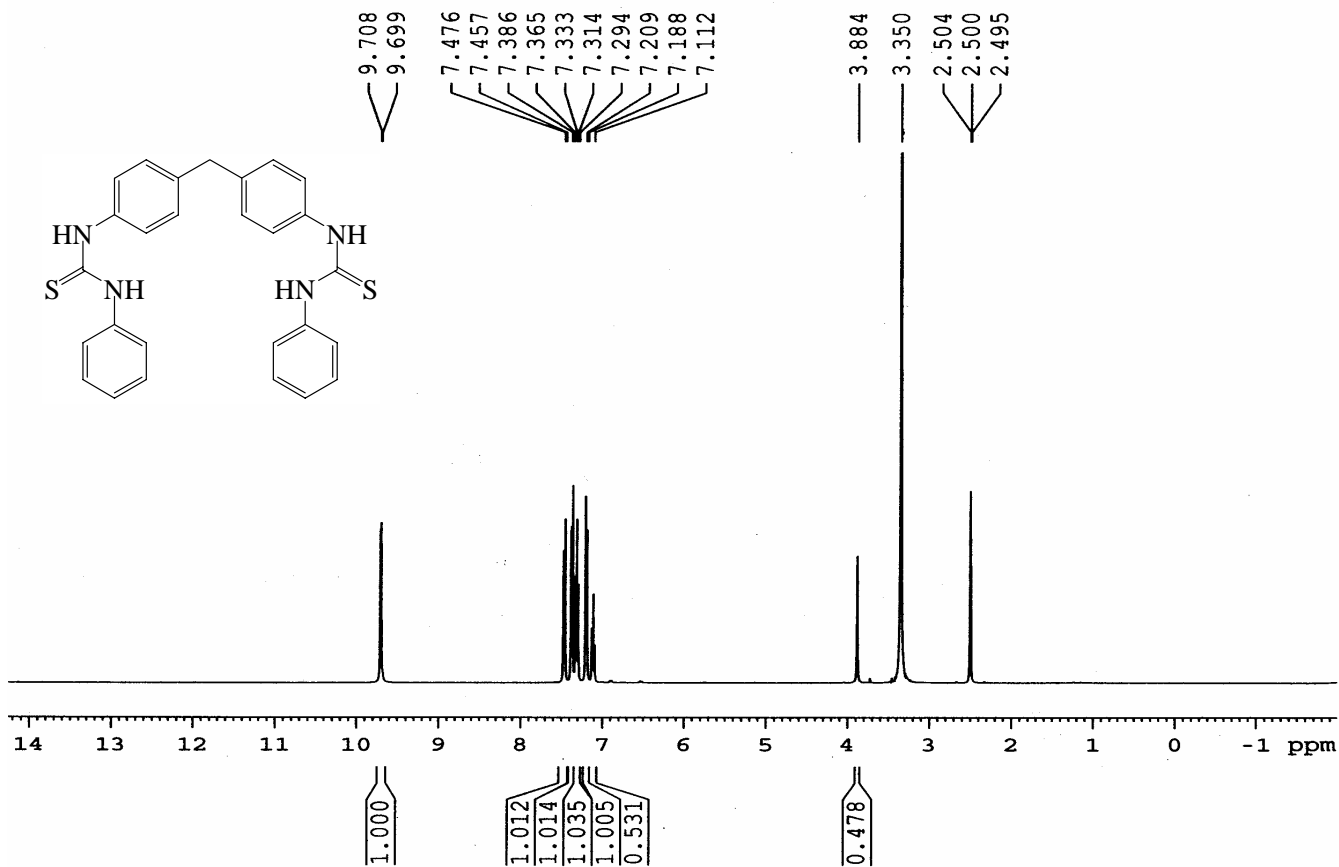

**<sup>13</sup>C NMR spectrum of 1 (DMF-d6)**

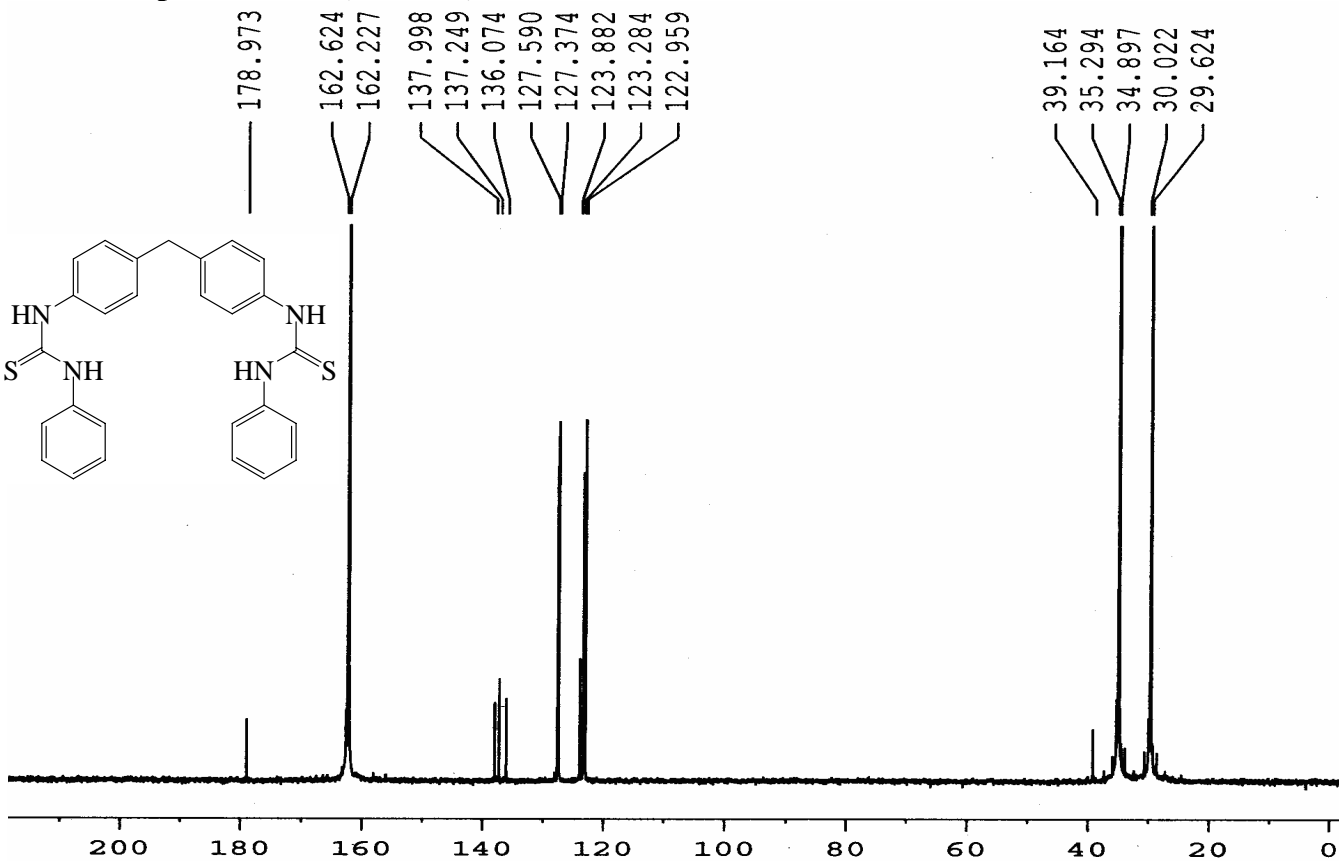

**<sup>1</sup>H NMR spectrum of 2 (DMSO-d6)**

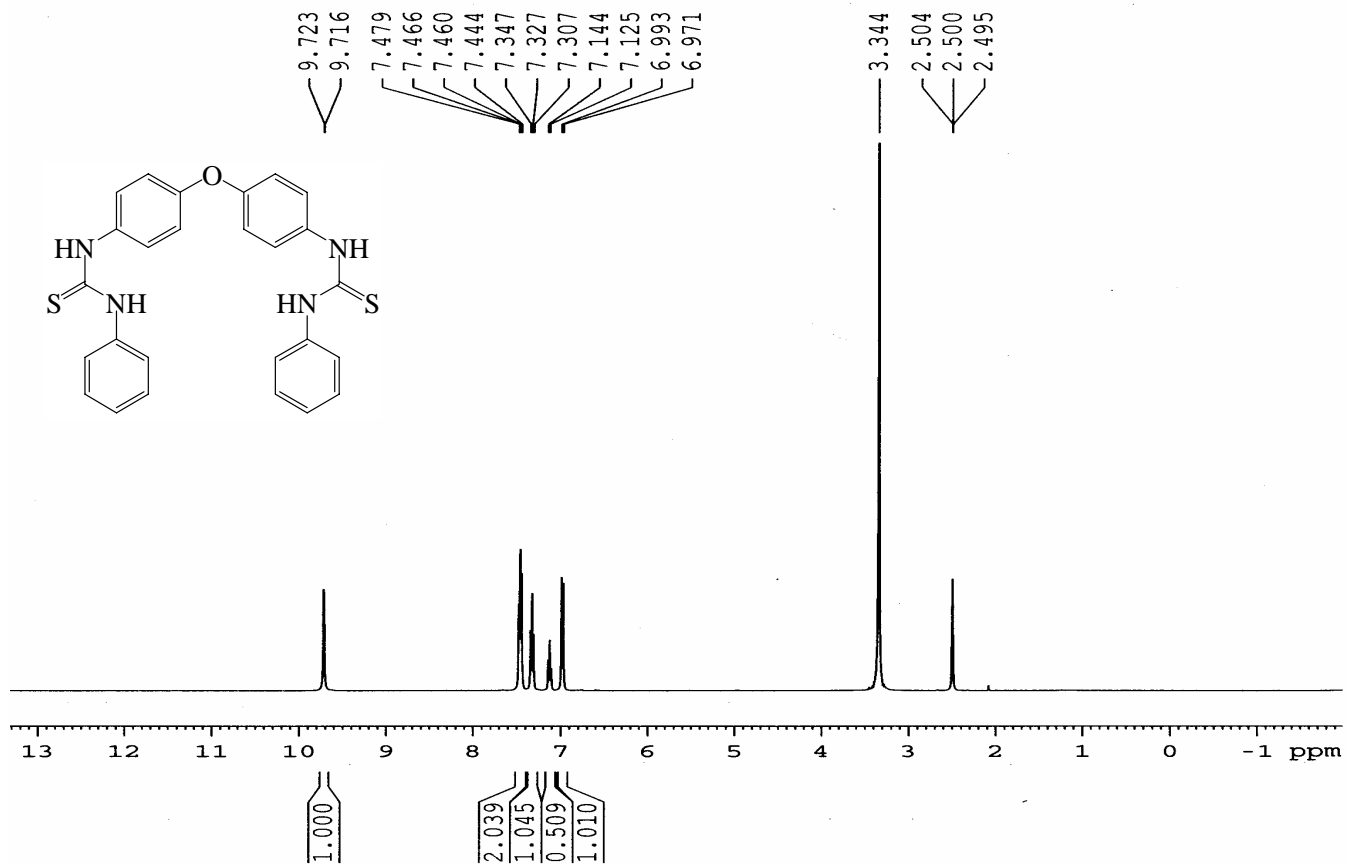

**<sup>1</sup>H NMR spectrum of 2 (DMSO-d<sub>6</sub>)**

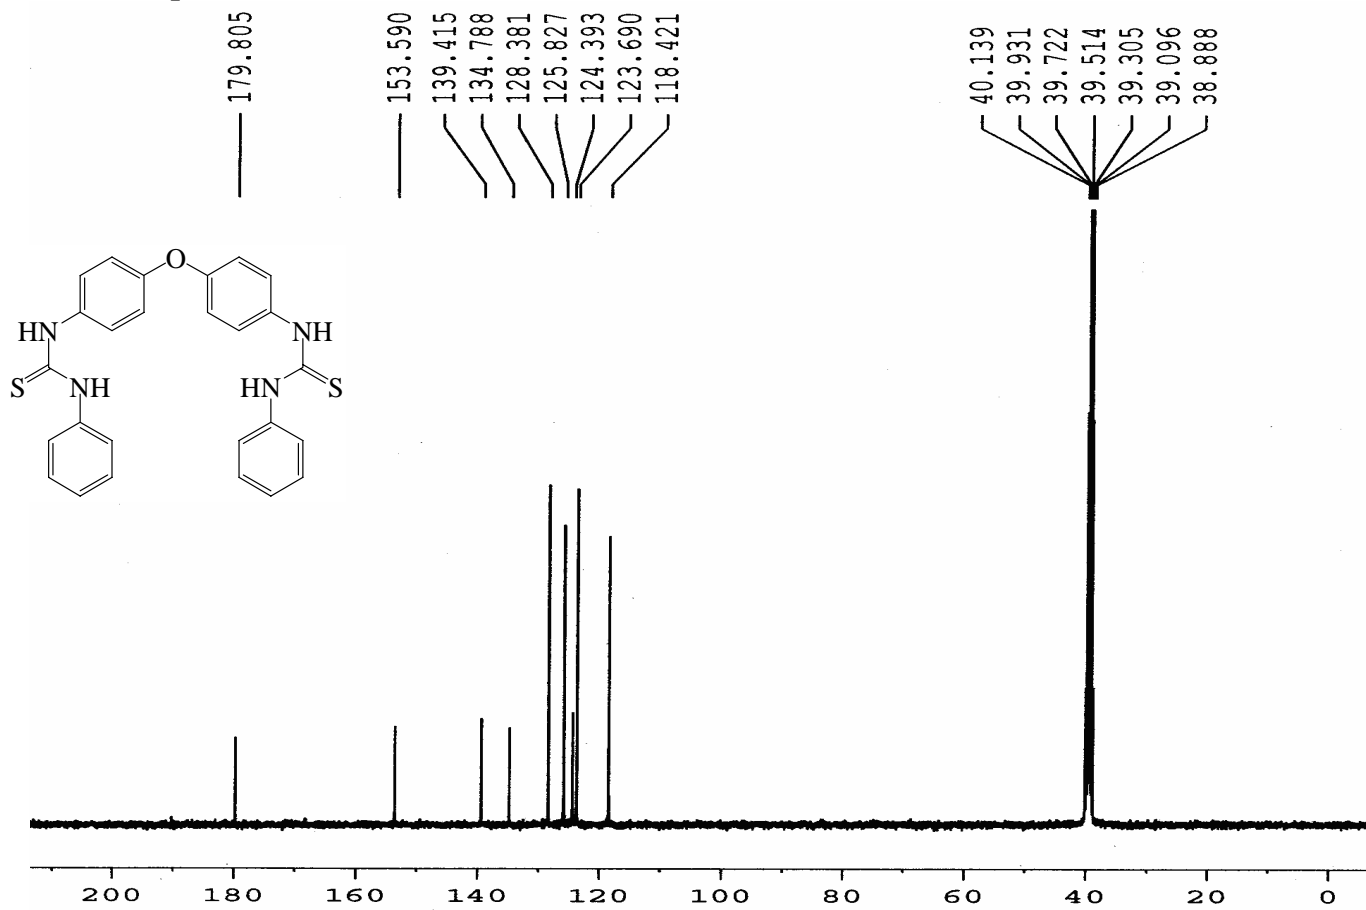

**<sup>13</sup>C NMR spectrum of 3 (DMSO-d<sub>6</sub>)**

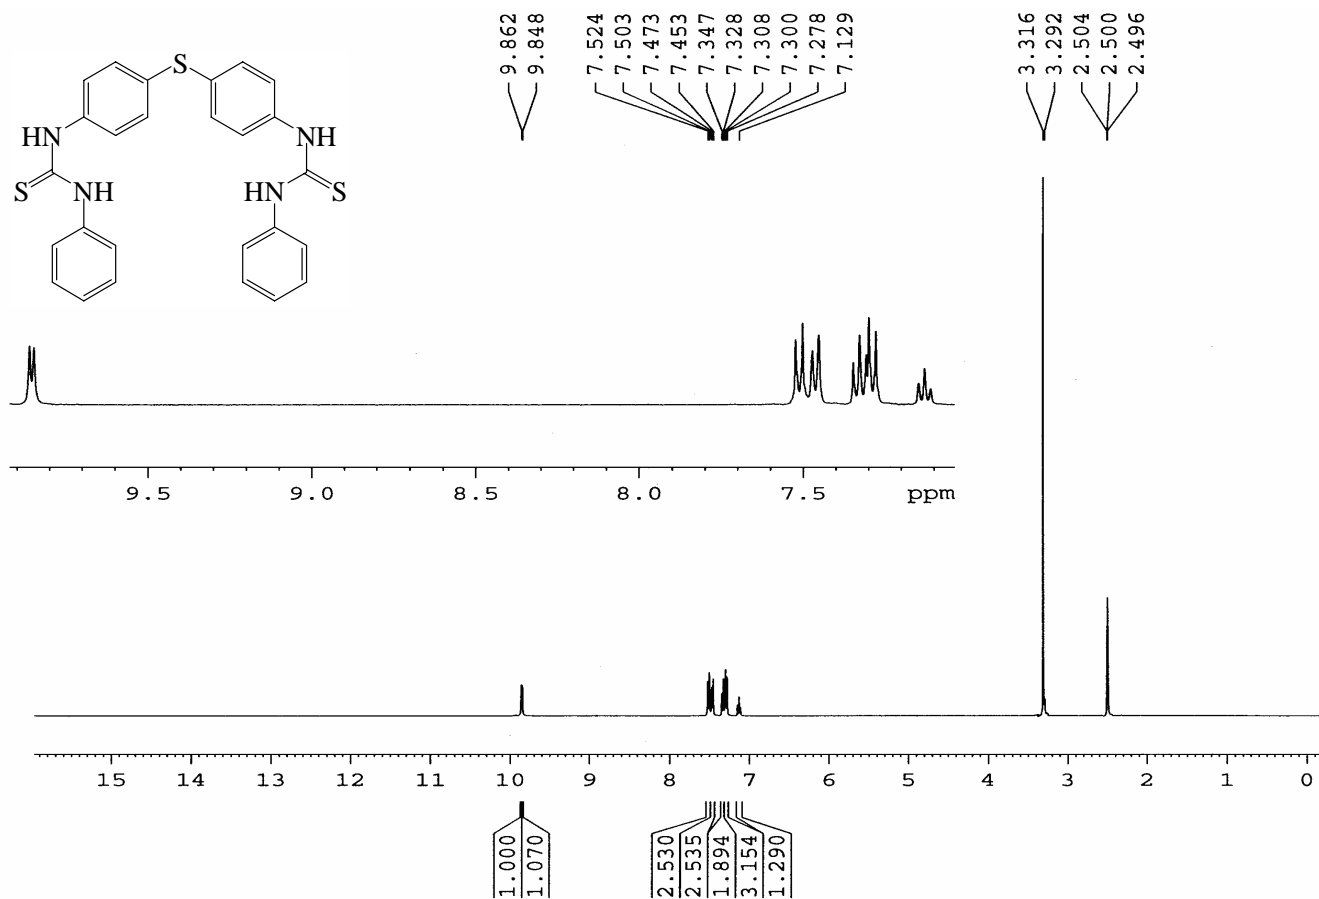

**<sup>13</sup>C NMR spectrum of 3 (DMSO-d<sub>6</sub>)**

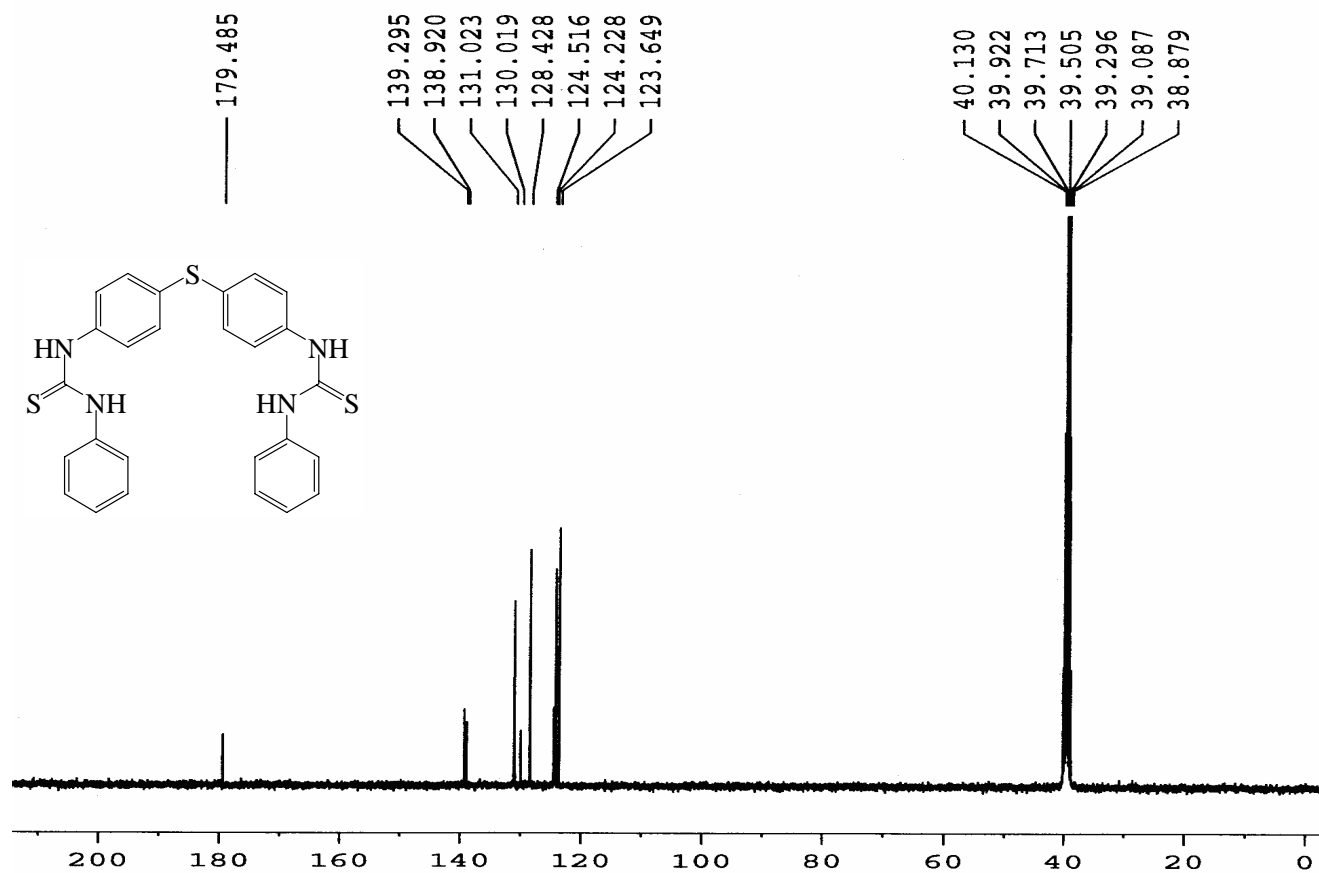

**<sup>1</sup>H NMR spectrum of 4 (DMSO-d<sub>6</sub>)**

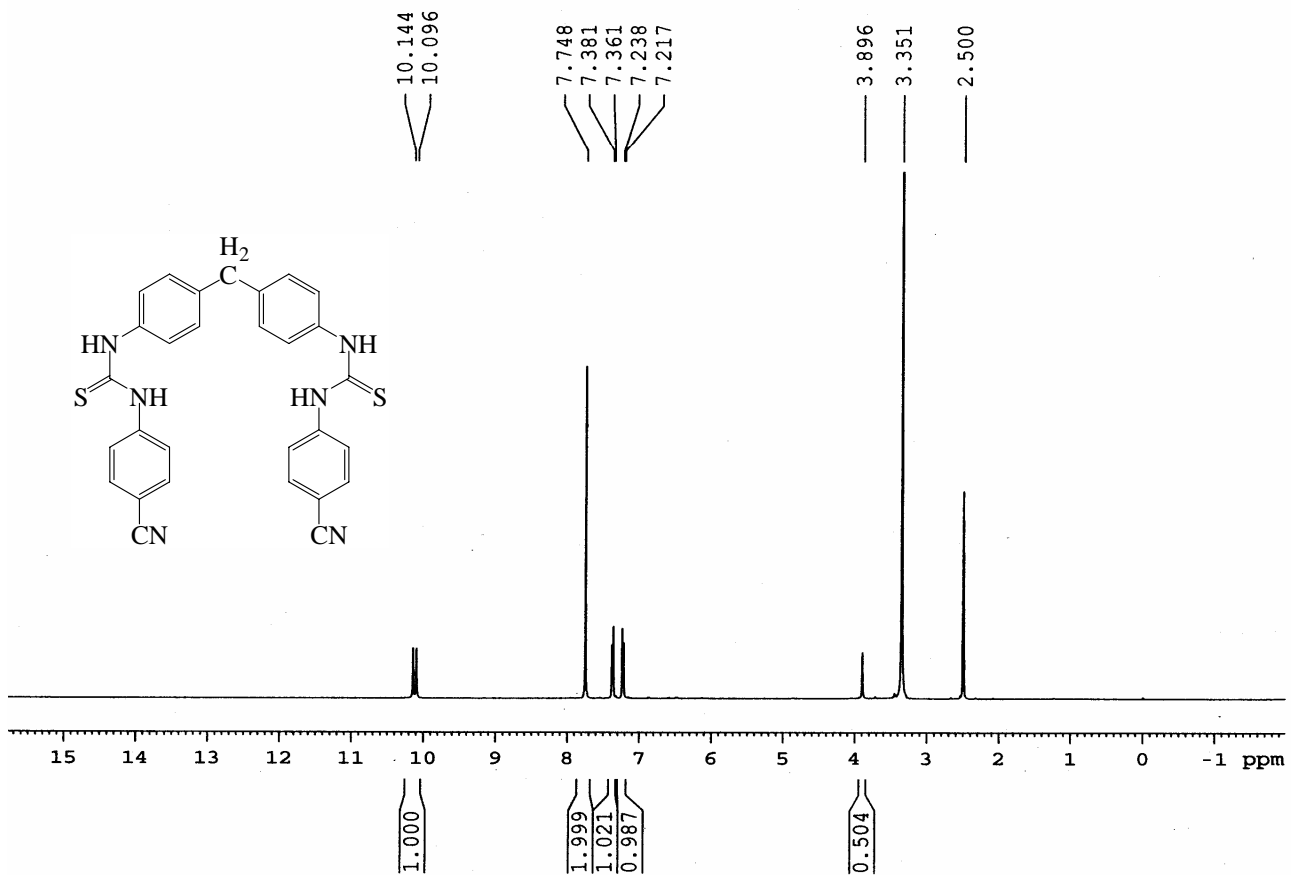

**<sup>13</sup>C NMR spectrum of 4 (DMF-d<sub>6</sub>)**

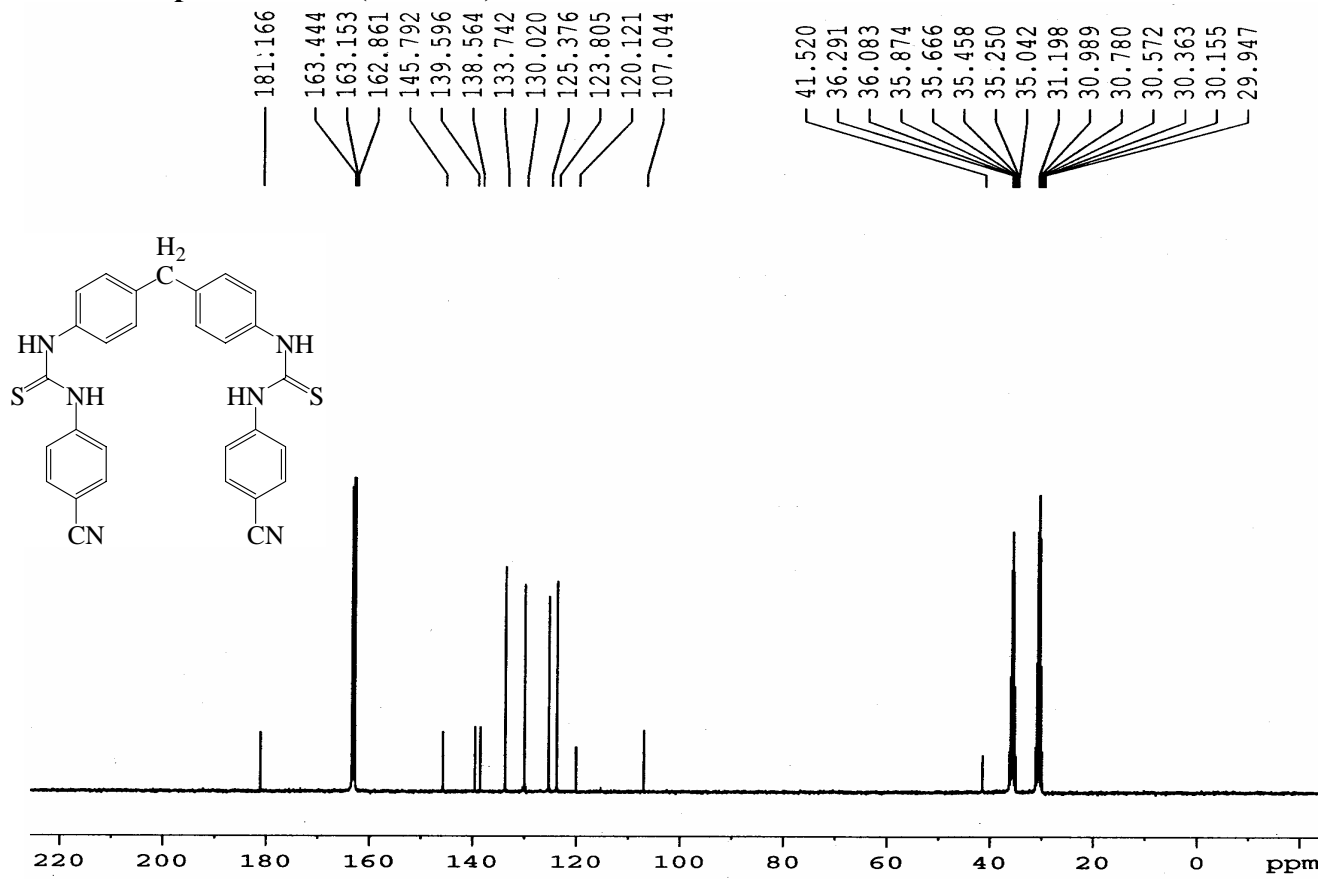

**<sup>1</sup>H NMR spectrum of 5 (DMSO-d<sub>6</sub>)**

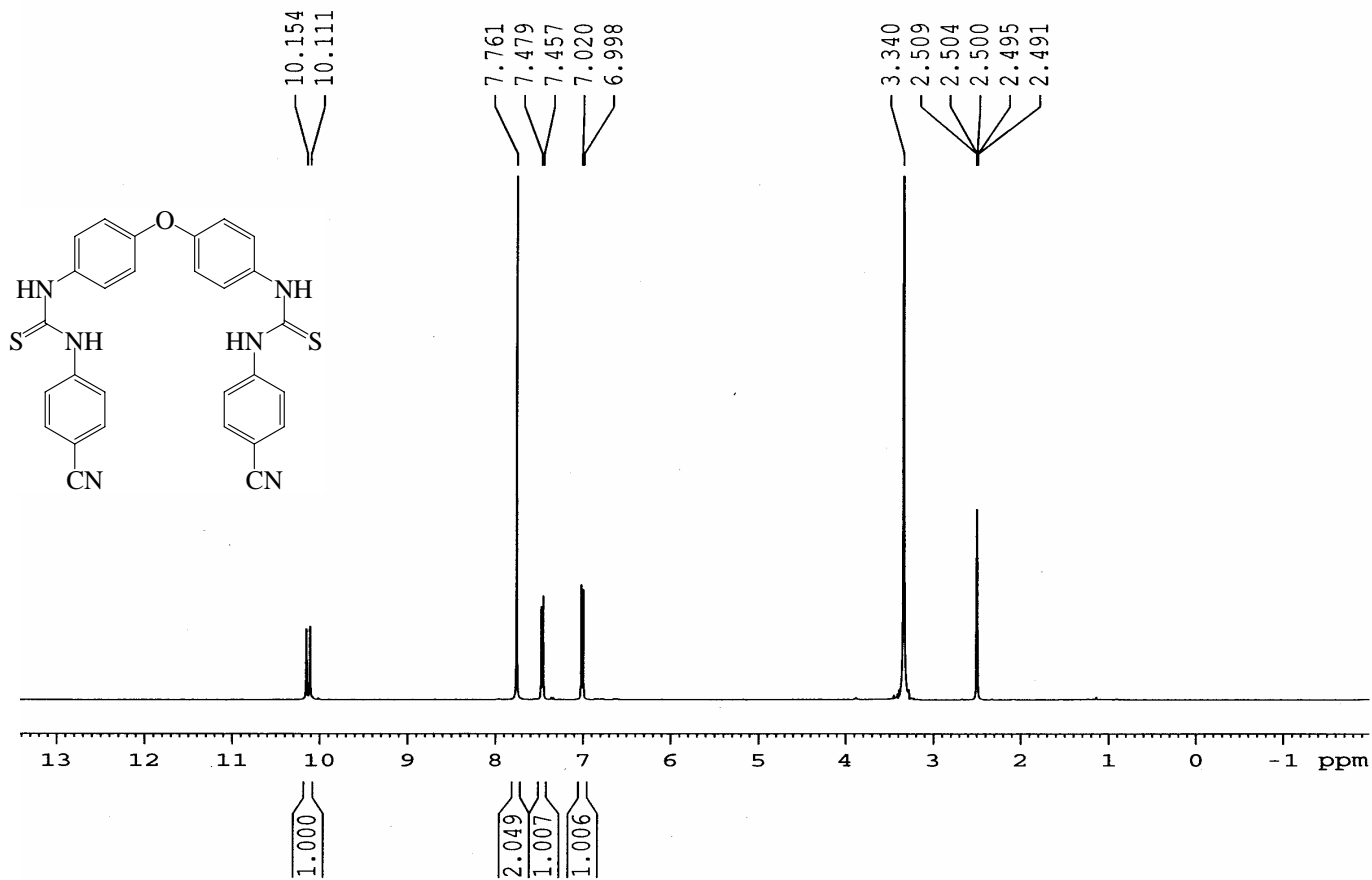

**<sup>13</sup>C NMR spectrum of 5 (DMSO-d<sub>6</sub>)**

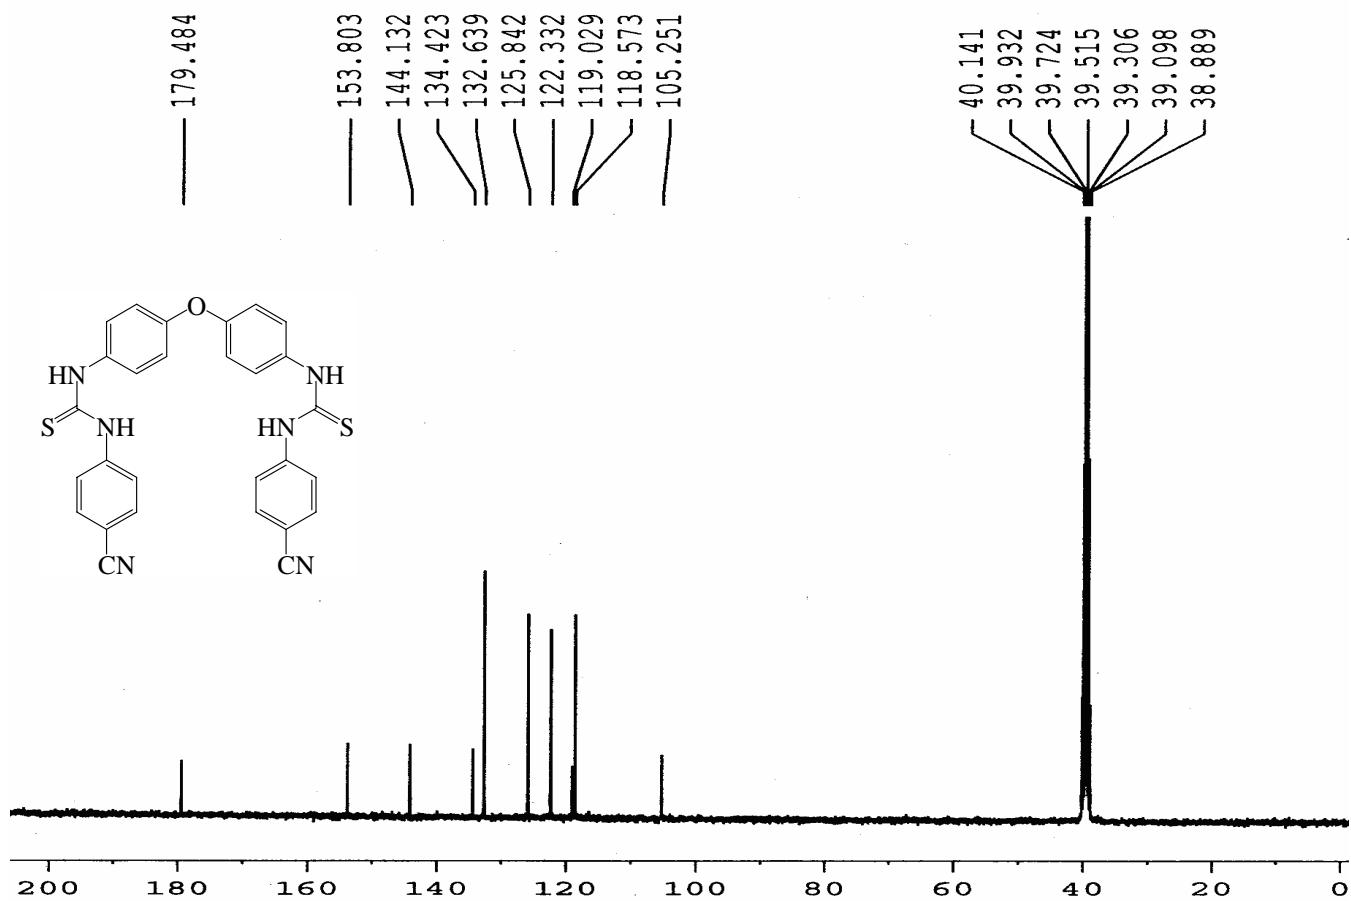

**<sup>13</sup>C NMR spectrum of 6 (DMSO-d<sub>6</sub>)**



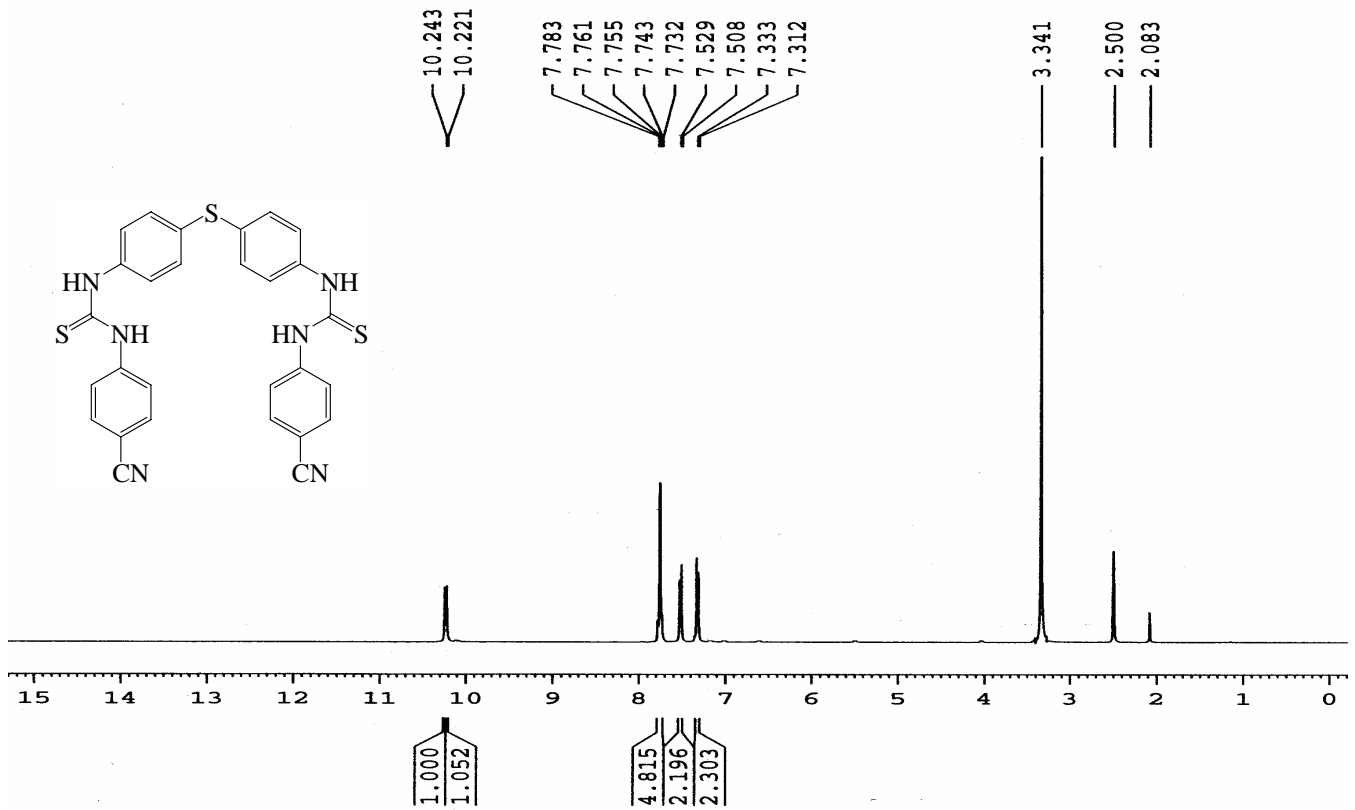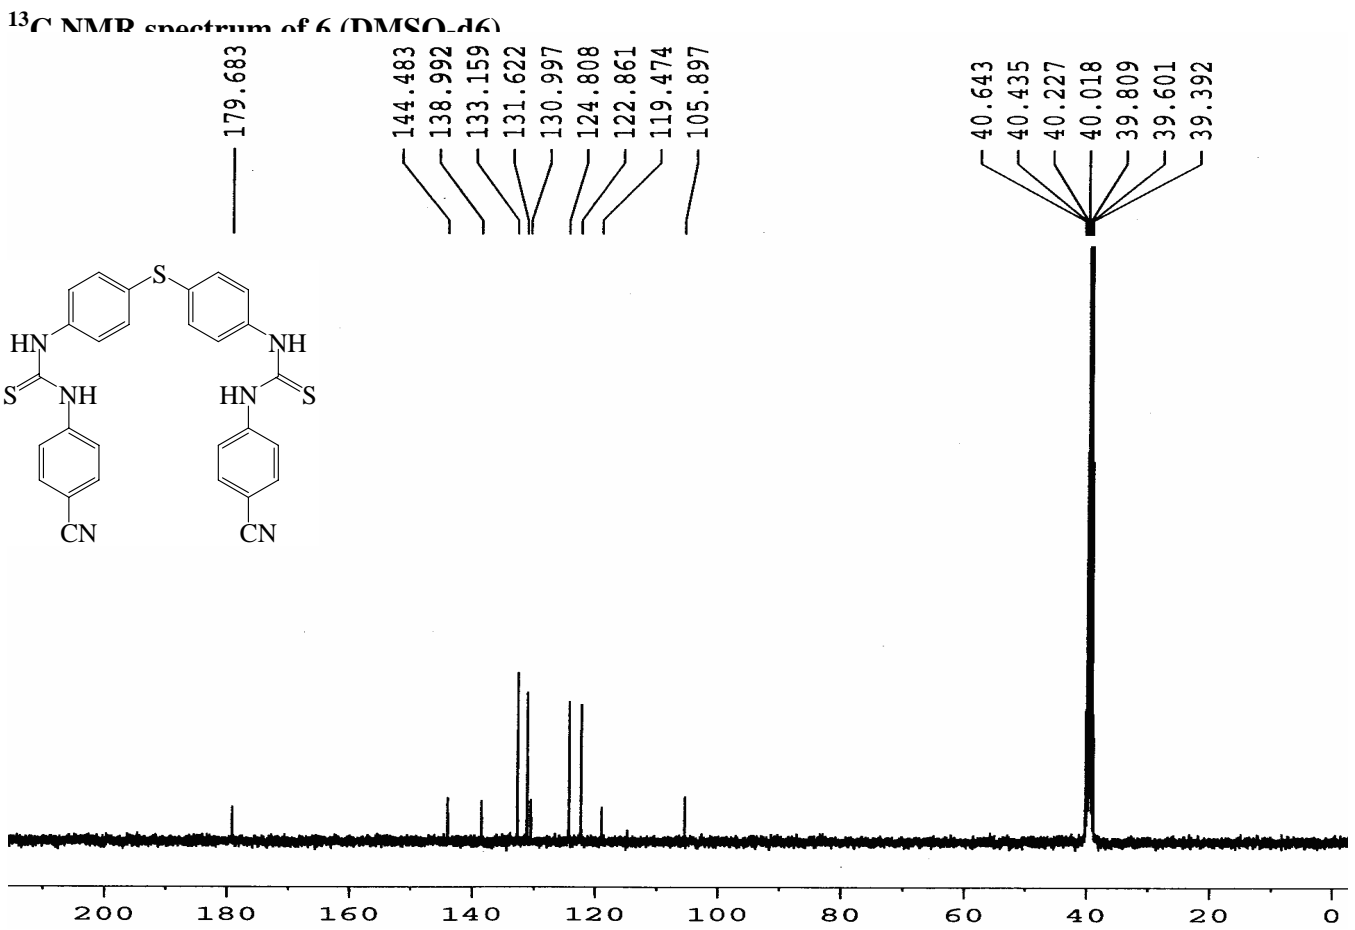

**<sup>1</sup>H NMR spectrum of 7 (DMSO-d<sub>6</sub>)**

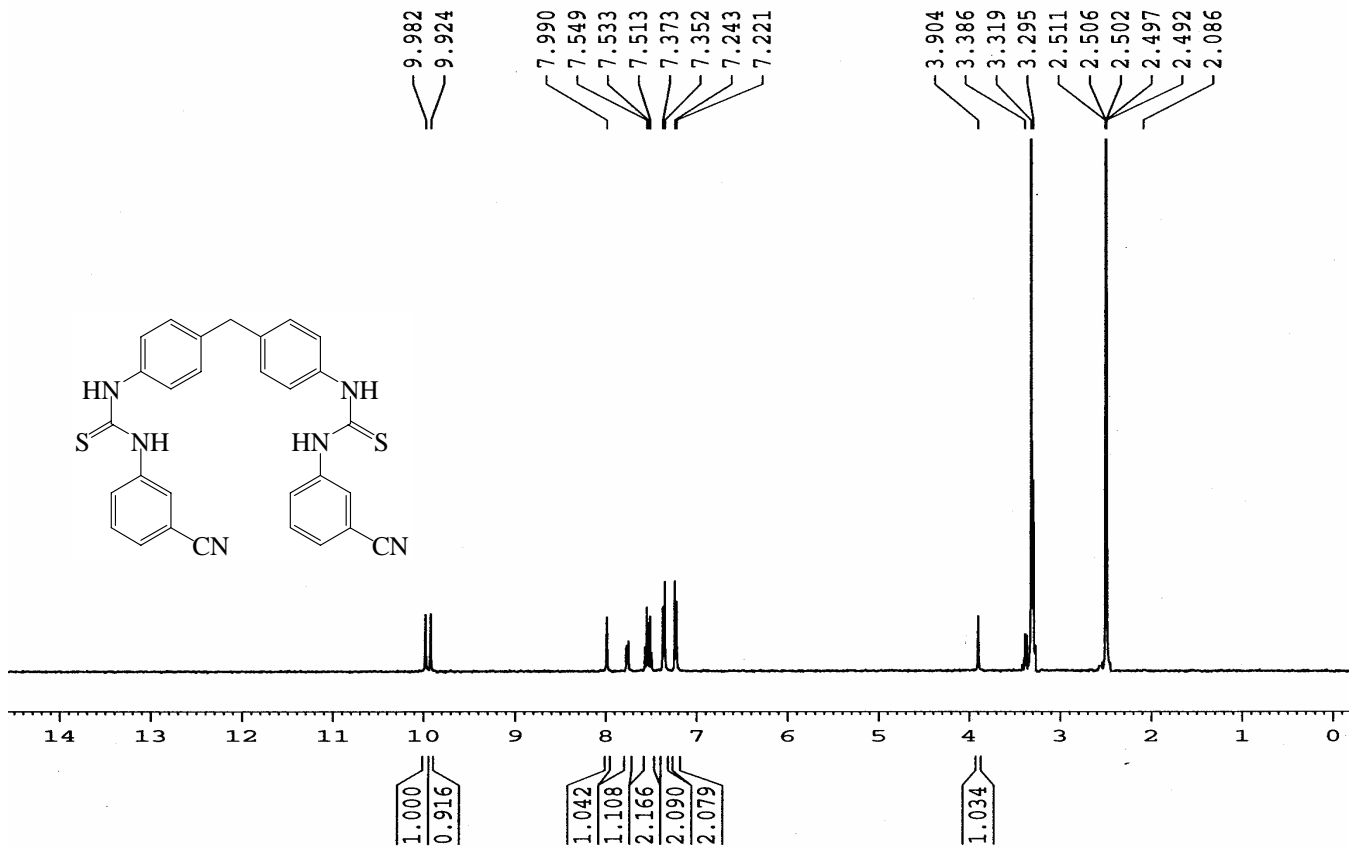

**<sup>13</sup>C NMR spectrum of 7 (DMF-*d*<sub>6</sub>)**

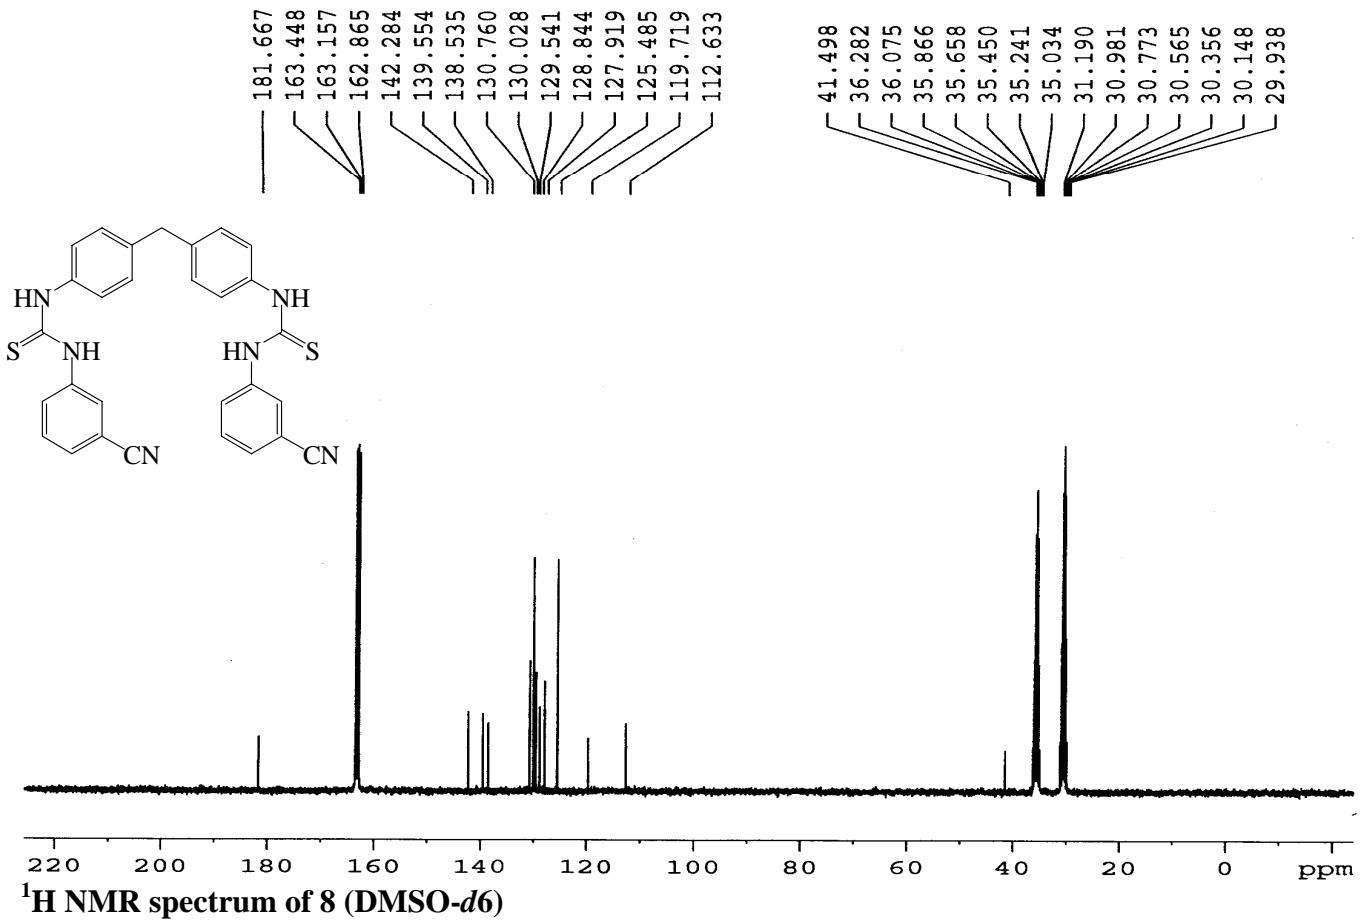

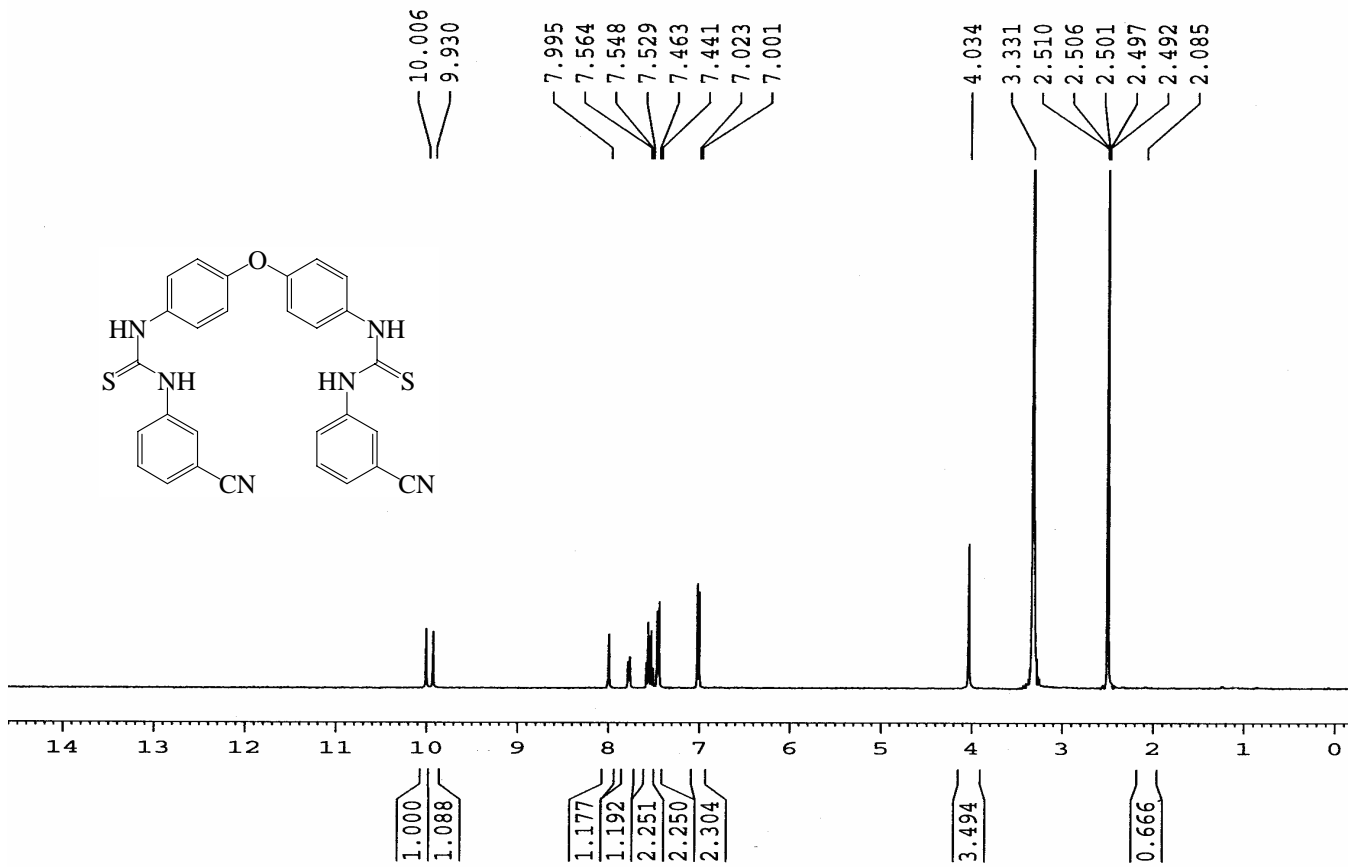

**<sup>13</sup>C NMR spectrum of 8 (DMSO-*d*<sub>6</sub>)**

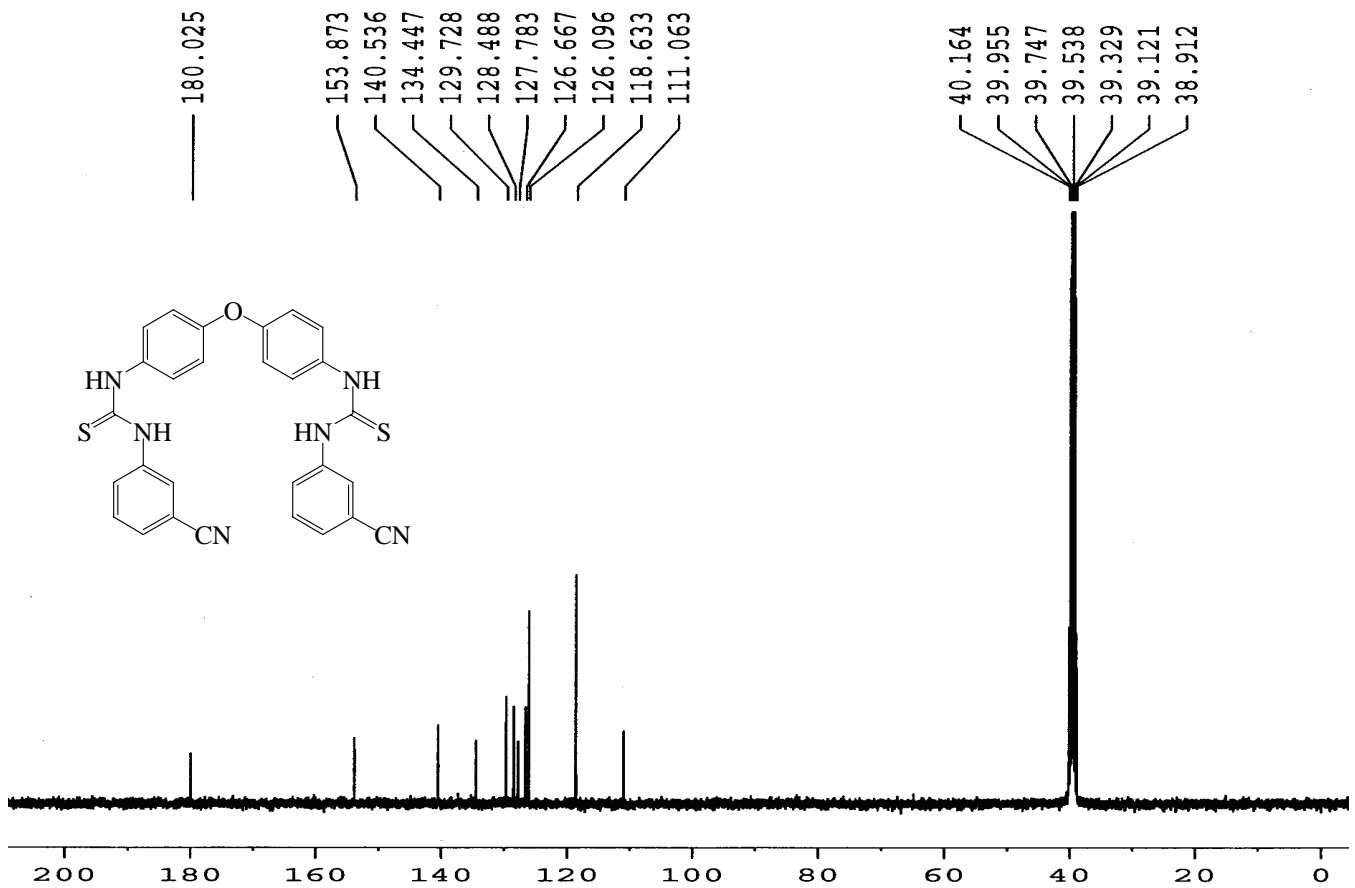

**<sup>1</sup>H NMR spectrum of 9 (DMSO-*d*<sub>6</sub>)**

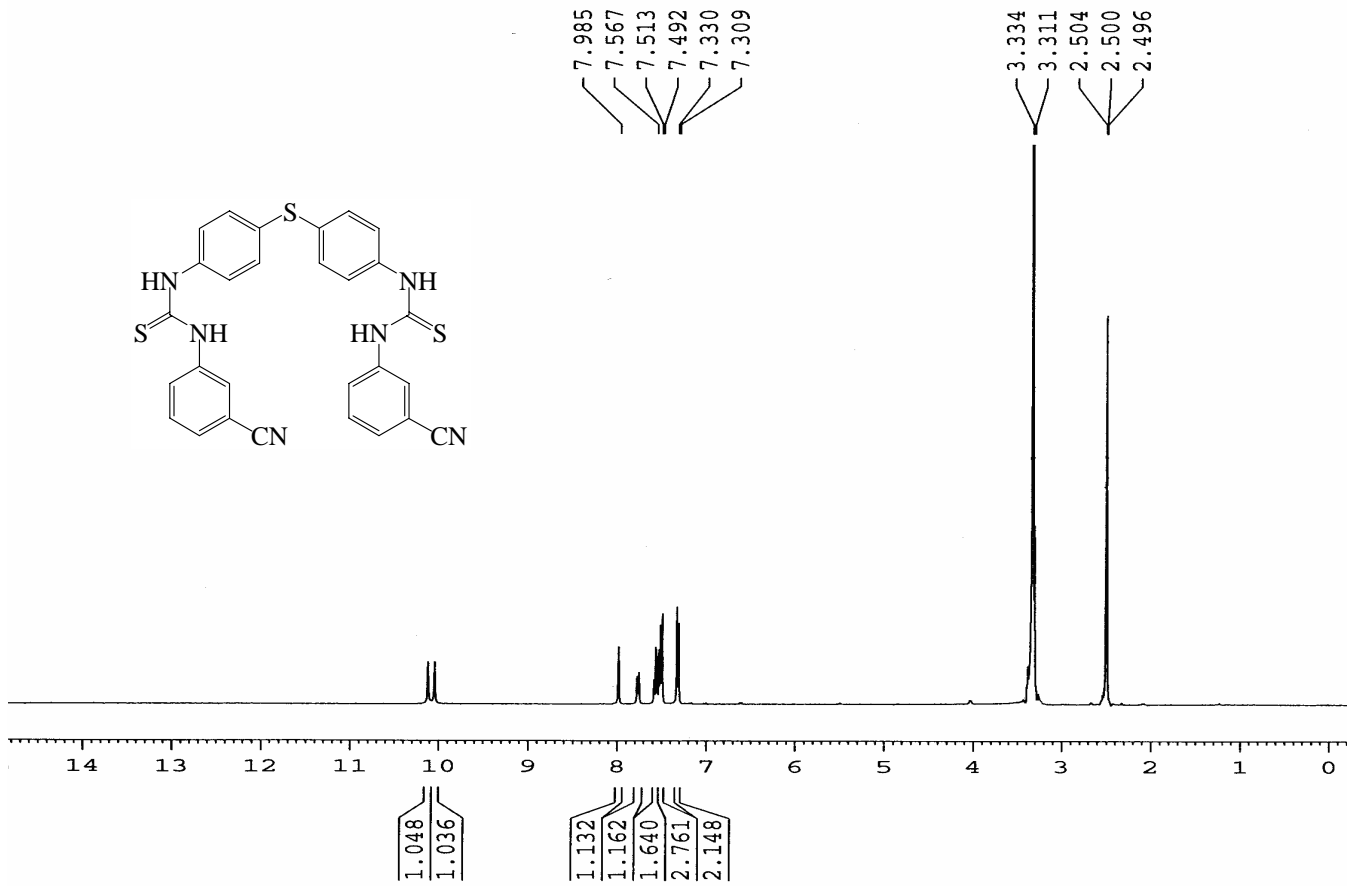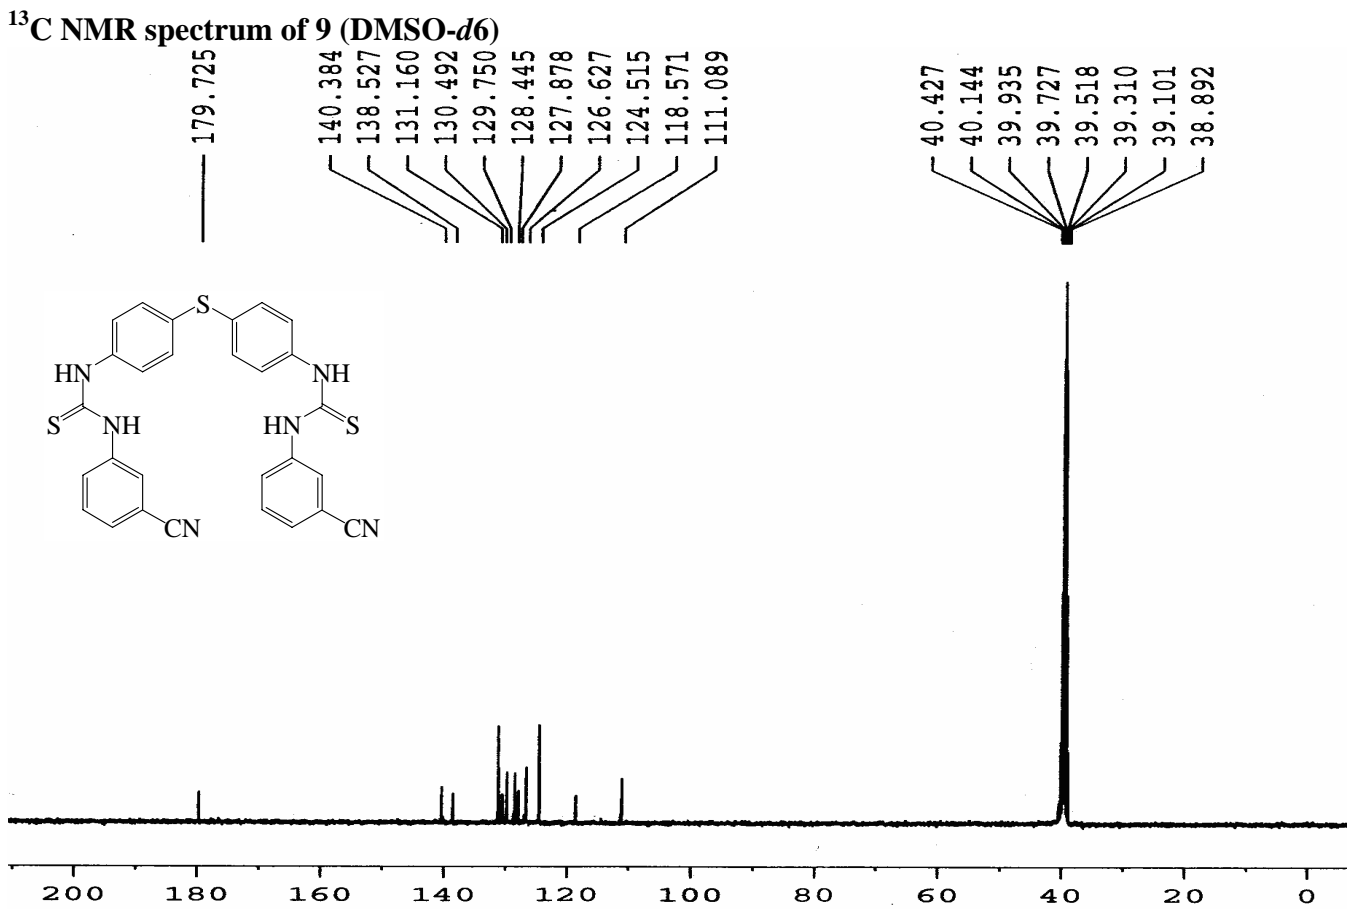

**<sup>1</sup>H NMR spectrum of 10 (DMSO-d<sub>6</sub>)**

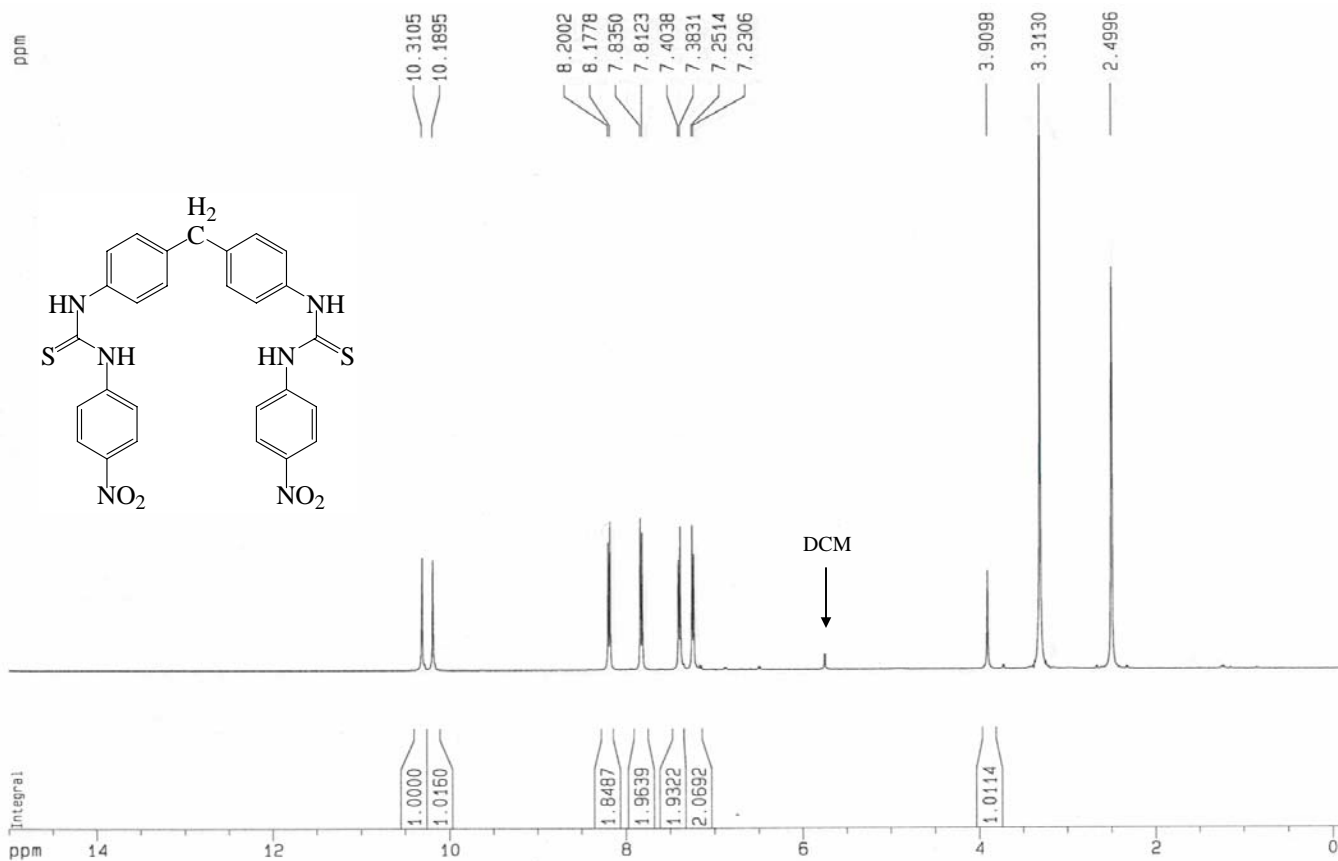

**<sup>13</sup>C NMR spectrum of 10 (CD<sub>3</sub>COCD<sub>3</sub>)**

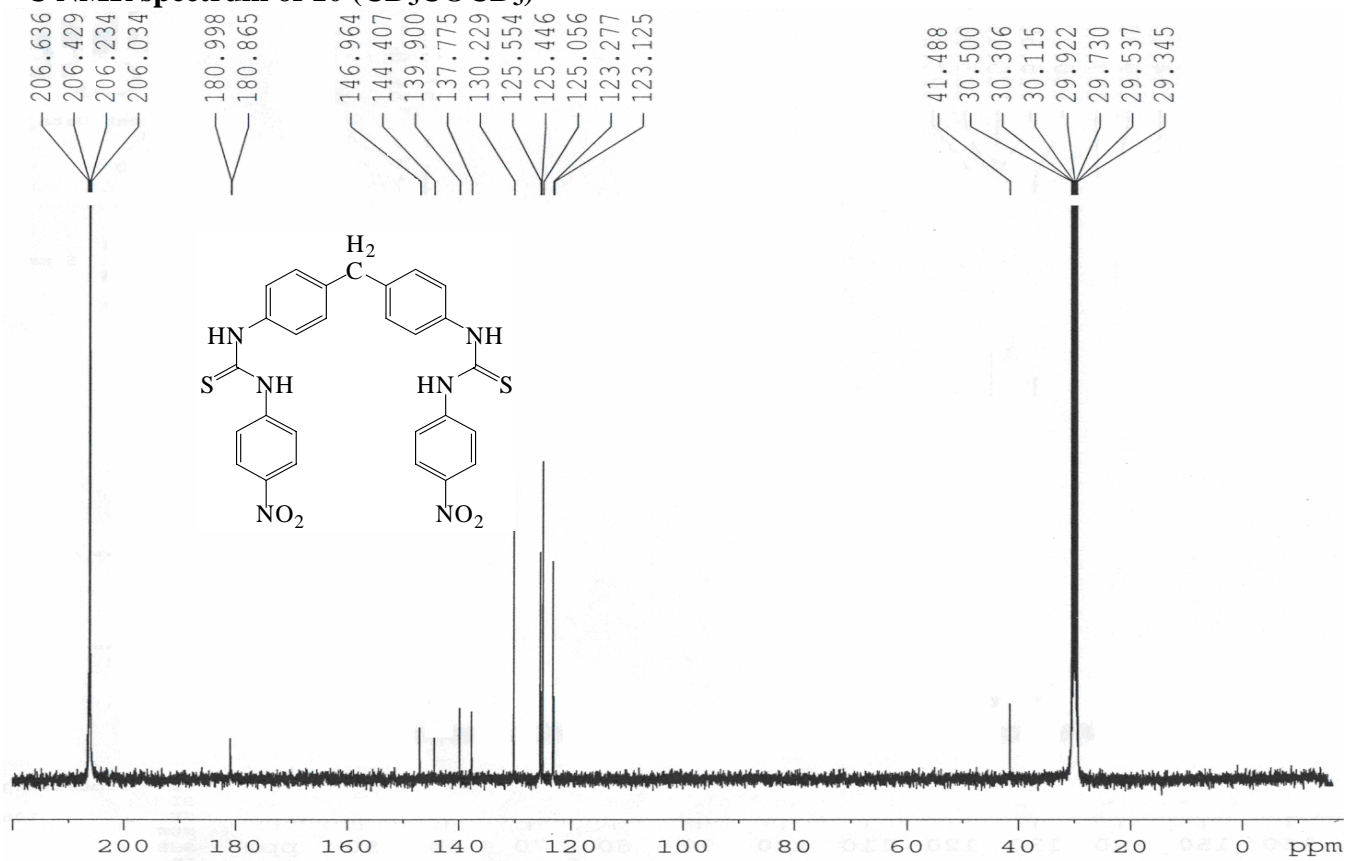

**<sup>1</sup>H NMR spectrum of 11 (DMSO-*d*<sub>6</sub>)**

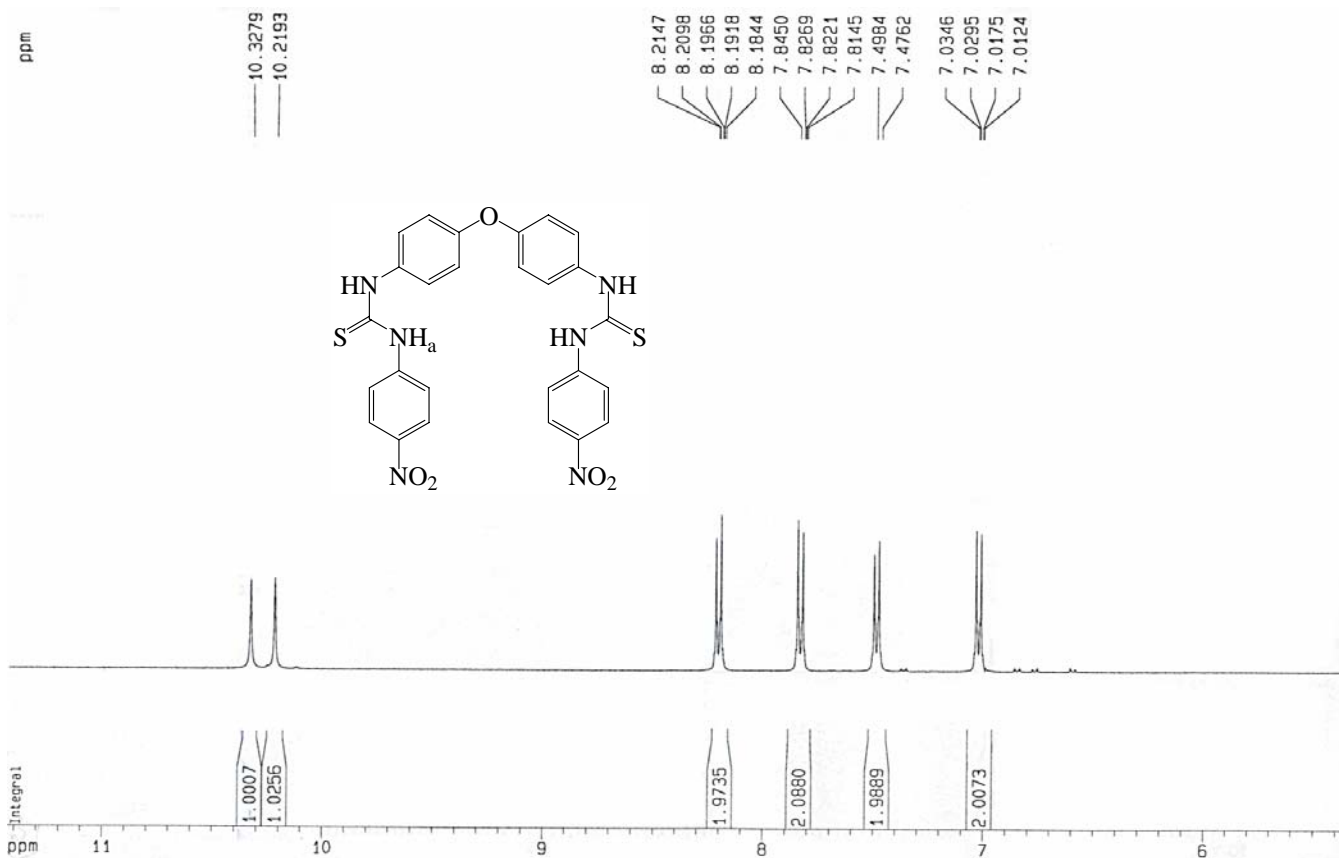

**<sup>13</sup>C NMR spectrum of 11 (DMSO-*d*<sub>6</sub>)**

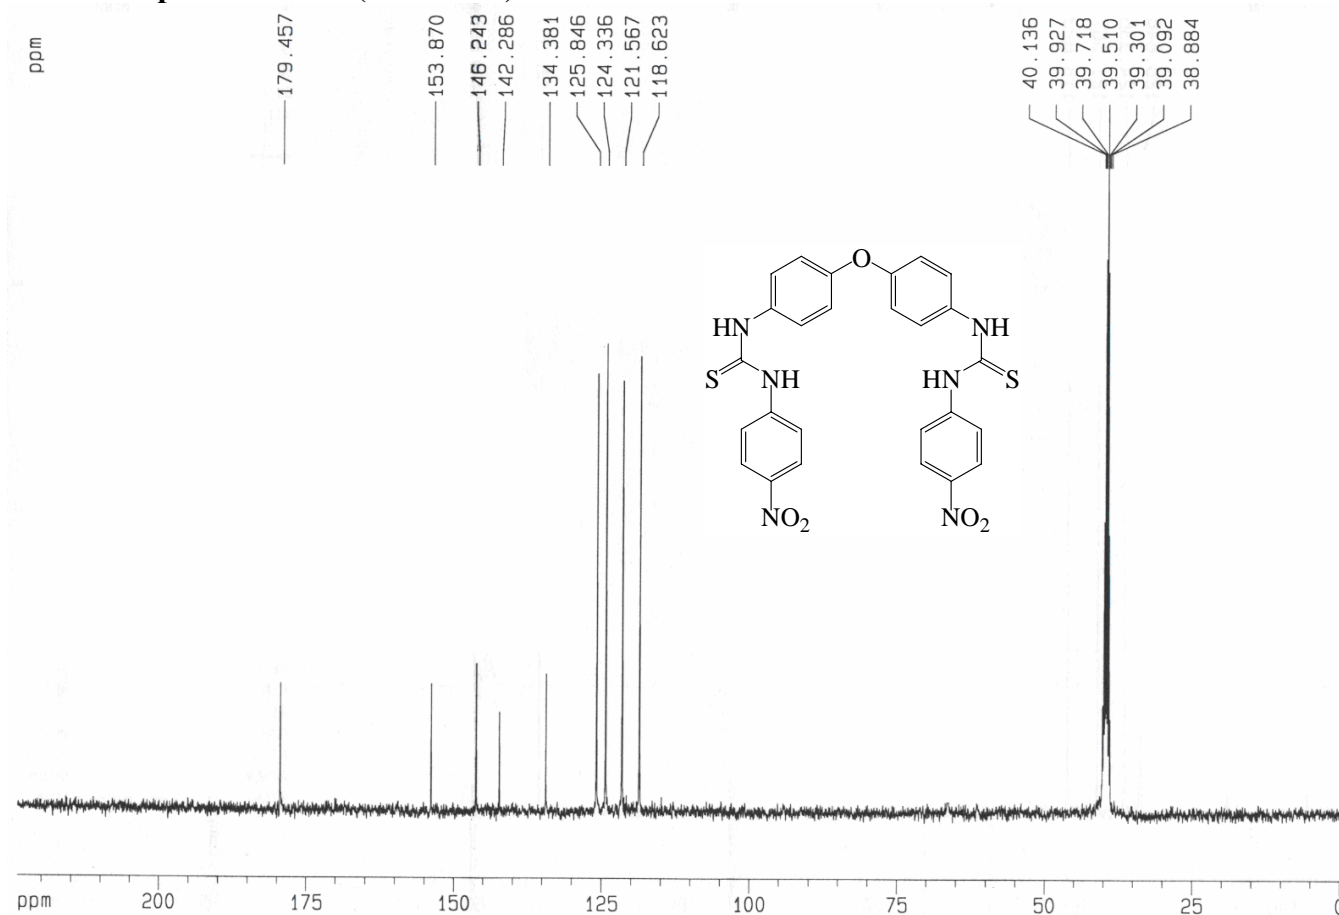

**<sup>1</sup>H NMR spectrum of 12 (DMSO-*d*<sub>6</sub>)**

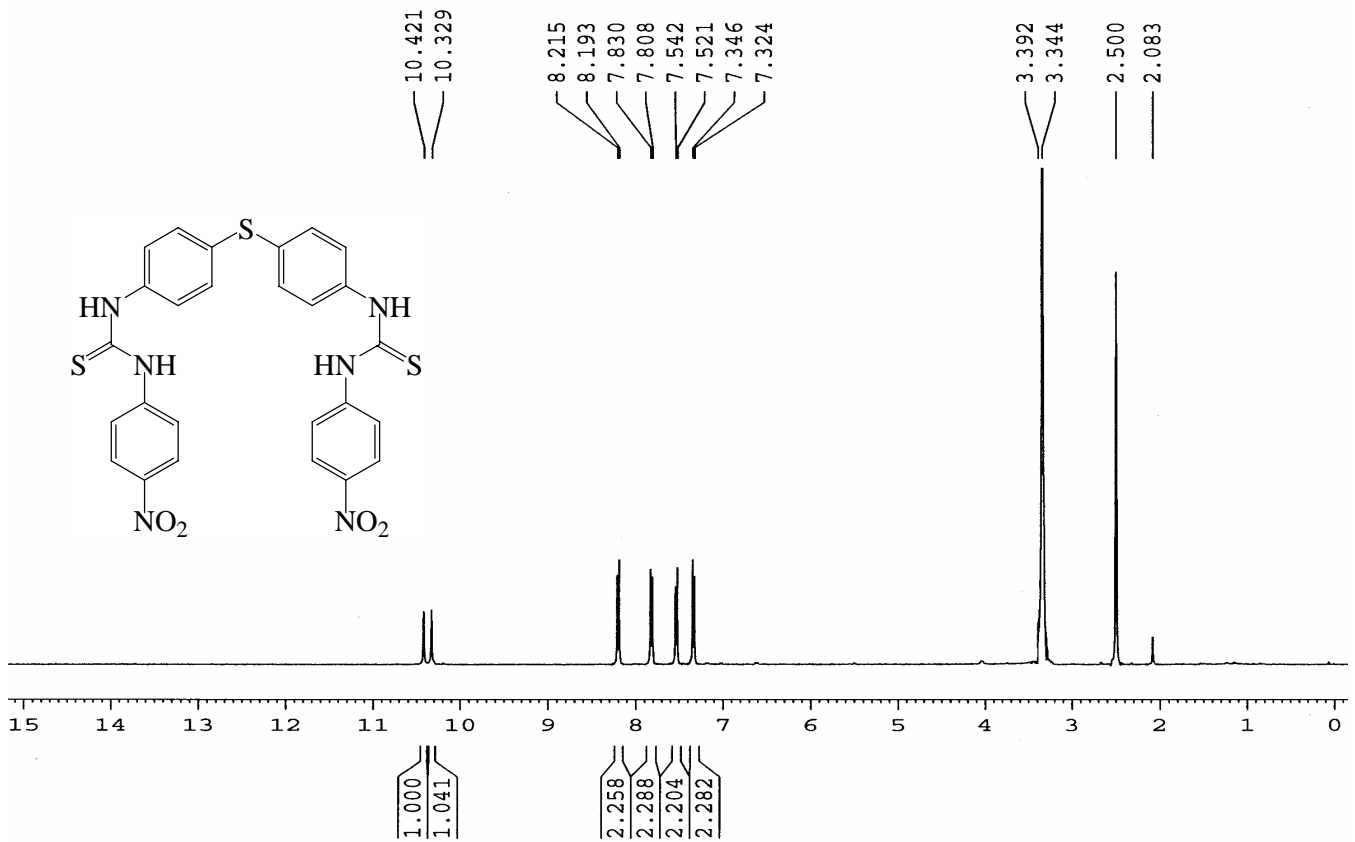

**<sup>13</sup>C NMR spectrum of 12 (DMSO-*d*<sub>6</sub>)**

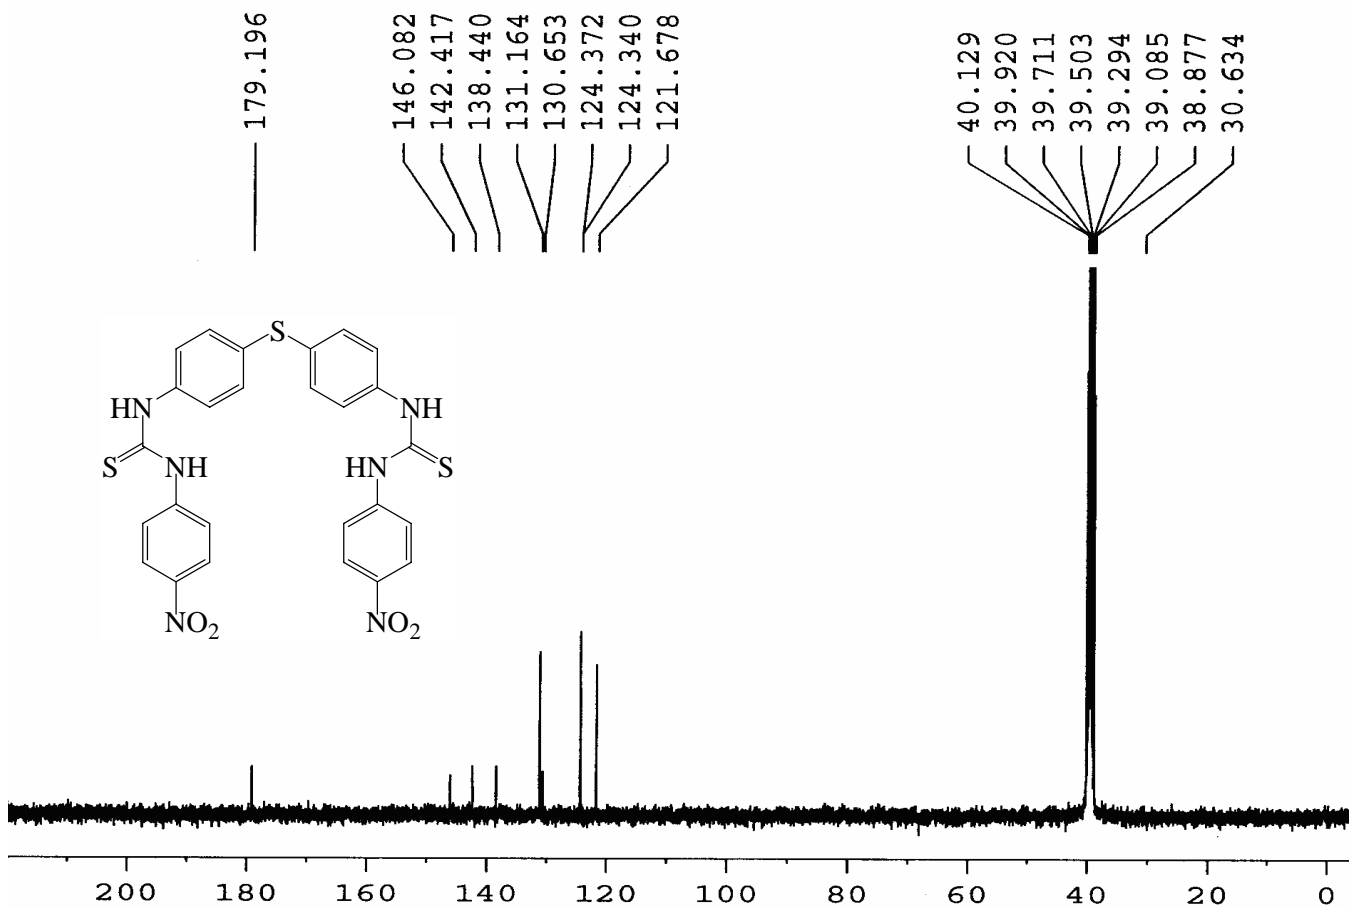

Supplement: c0an00959h.pdf [file c0an00959h.pdf]
